# Supplementary material
Source: publisher site journal article supplement (https://www.dovepress.com/article/338243)
Supplement: Supplementary file 1 [file get_supplementary_file.php]

Supplementary Table 1: Data collection tool for practice and factors associated with proper informed consenting process for major surgical procedure among health care workers in public hospitals

English version Self-administered Questionnaire

**Part I: Socio-demographic characteristics of the respondents**

Instruction: Please circle the number in front of the option you choose & fill in the blank space that best describe you on the right side of the table

Q. ID \_\_\_\_\_

| S. No | Variables                                                                            | Response                                                            |
|-------|--------------------------------------------------------------------------------------|---------------------------------------------------------------------|
| 101   | Age                                                                                  | _____                                                               |
| 102   | Sex                                                                                  | 1. Male 2. Female                                                   |
| 103   | Religion                                                                             | 1. Orthodox<br>2. Islam<br>3. Protestant<br>4. others(specify)_____ |
| 104   | Ethnicity                                                                            | 1. Oromo<br>2. Amhara<br>3. Other specify_____                      |
| 105   | Current marital status                                                               | 1. Single<br>2. Married<br>3. Divorced<br>4. Widowed                |
| 106   | Educational status/professional(specify specialty)                                   | _____                                                               |
| 107   | Years of professional experience                                                     | _____ in years                                                      |
| 108   | Did you faced challenges in communication with your patient due to language barrier? | Yes<br>No                                                           |

## Part II- Organizational Factors

| S. No | Variables                                                                                                                          | Response                                                                       |
|-------|------------------------------------------------------------------------------------------------------------------------------------|--------------------------------------------------------------------------------|
| 201   | Working unit                                                                                                                       | _____                                                                          |
| 202   | How many patients do you see/giving care on average in a day/per shift?                                                            | _____                                                                          |
| 203   | How much time do you spend giving information about a treatment or procedure to a patient during a professional encounter?         | 1. <5minutes<br>2. 5-10 mins<br>3. 11-20 mins<br>4. 21-30 mins<br>5. > 30 mins |
| 204   | Do you think the consent form contents currently used in your hospital is adequate to obtain valid informed consent from patients? | 1. Yes 2. No<br>3. I don't know                                                |
| 205   | Is there a policy or regulations that support practice of informed consent process in your institution?                            | 1. Yes 2. No<br>3. I don't know                                                |
| 206   | Do you have had administrative support like interpreters available?                                                                | 1. Yes<br>2. No                                                                |
| 207   | Have you had training on the process of Surgical informed consent?                                                                 | 1. Yes 2. No                                                                   |

## Part III: Knowledge related Questions

| S. No | Variables                                                | Response                        | Skip                        |
|-------|----------------------------------------------------------|---------------------------------|-----------------------------|
| 301   | Do you know the informed consent process?                | 1. Yes 2. No<br>3. I don't know |                             |
| 302   | Do you know the requirements of valid consent?           | 1. Yes 2. No<br>3. I don't know | If no skip to<br>Q. No. 304 |
| 303   | If yes to Q. No. 302 which of the following do you know? |                                 |                             |
| 303a  | Capacity to give consent                                 | 1. Yes 2. No<br>3. I don't know |                             |
| 303b  | Voluntarily                                              | 1. Yes 2. No<br>3. I don't know |                             |

|      |                                                                                                    |                                 |                             |
|------|----------------------------------------------------------------------------------------------------|---------------------------------|-----------------------------|
| 303c | Comprehensiveness of information                                                                   | 1. Yes 2. No<br>3. I don't know |                             |
| 304  | Do you know the types of informed consent?                                                         | 1. Yes 2. No<br>3. I don't know | If no skip to<br>Q. No. 306 |
| 305  | If yes to Q. No. 304 which one do you know?                                                        |                                 |                             |
| 305a | Implied                                                                                            | 1. Yes 2. No<br>3. I don't know |                             |
| 305b | Expressed                                                                                          | 1. Yes 2. No<br>3. I don't know |                             |
| 306  | Is the informed consent process legally regulated?                                                 | 1. Yes 2. No<br>3. I don't know |                             |
| 307  | Do you know the component of informed consent process to be disclosed for patients?                | 1. Yes 2. No<br>3. I don't know |                             |
| 308  | Does patient's consent help with the treatment?                                                    | 1. Yes 2. No<br>3. I don't know |                             |
| 309  | Do you think that consent should be obtained for incapacitated/child patient?                      | 1. Yes 2. No<br>3. I don't know |                             |
| 310  | Do you generally presume that your patients should must have the capacity to consent to treatment? | 1. Yes 2. No<br>3. I don't know |                             |

#### Part IV: Attitude related Questions

| S. No | Variables                                                                                              | Response                                                                           |
|-------|--------------------------------------------------------------------------------------------------------|------------------------------------------------------------------------------------|
| 401   | Informed consent is not all about signature of the patients and health care providers.                 | 1. Strongly agree<br>2. Agree<br>3. Neutral<br>4. Disagree<br>5. Strongly disagree |
| 402   | The threshold elements (preconditions) to obtain consent are competence and voluntariness of patients. | 1. Strongly agree<br>2. Agree<br>3. Neutral                                        |

|     |                                                                                                                        |                                                                                    |
|-----|------------------------------------------------------------------------------------------------------------------------|------------------------------------------------------------------------------------|
|     |                                                                                                                        | 4. Disagree<br>5. Strongly disagree                                                |
| 403 | Decision making about proposed treatment/procedure is not belongs to health care provider.                             | 1. Strongly agree<br>2. Agree<br>3. Neutral<br>4. Disagree<br>5. Strongly disagree |
| 404 | All risks need to be explained to the patient                                                                          | 1. Strongly agree<br>2. Agree<br>3. Neutral<br>4. Disagree<br>5. Strongly disagree |
| 405 | It is important to repeat the explanation if the patient demands it.                                                   | 1. Strongly agree<br>2. Agree<br>3. Neutral<br>4. Disagree<br>5. Strongly disagree |
| 406 | The duty of obtaining informed consent is belongs to health care provider who is doing the procedure.                  | 1. Strongly agree<br>2. Agree<br>3. Neutral<br>4. Disagree<br>5. Strongly disagree |
| 407 | Informed consent Improve the patient's compliance with medical care                                                    | 1. Strongly agree<br>2. Agree<br>3. Neutral<br>4. Disagree<br>5. Strongly disagree |
| 408 | For a choice to be autonomous a person must act with intention, with understanding and without controlling influences. | 1. Strongly agree<br>2. Agree<br>3. Neutral<br>4. Disagree                         |

|     |                                                                                                                                                   |                                                                                    |
|-----|---------------------------------------------------------------------------------------------------------------------------------------------------|------------------------------------------------------------------------------------|
|     |                                                                                                                                                   | 5. Strongly disagree                                                               |
| 409 | Appropriate family members or health care surrogates involves in decision making during emergencies or incompetence when patient unable to do so. | 1. Strongly agree<br>2. Agree<br>3. Neutral<br>4. Disagree<br>5. Strongly disagree |

**Part V: Practice of informed consent related Questionnaire**

| S. No | Variables                                                                                 | Response |           |        |
|-------|-------------------------------------------------------------------------------------------|----------|-----------|--------|
|       |                                                                                           | Never    | Sometimes | Always |
| 501   | I obtain informed consent from patients for major surgical procedures                     |          |           |        |
| 502   | I inform the patients why the surgery will be performed                                   |          |           |        |
| 503   | I inform the patients about presence/absence of alternative treatment option/s to surgery |          |           |        |
| 504   | I inform the patients about type of anesthesia to be used                                 |          |           |        |
| 505   | I explain the benefit of the procedure to the patient                                     |          |           |        |
| 506   | I explain the risks or potential complication/s related to the procedure to the patient   |          |           |        |
| 507   | I explain favorable environment to say no to the proposed surgery                         |          |           |        |
| 508   | I inform the patients about consequences of refusing the proposed surgery                 |          |           |        |

|     |                                                                                                                |  |  |  |
|-----|----------------------------------------------------------------------------------------------------------------|--|--|--|
| 509 | I provide counseling aids including the recommended treatment which assist in decision making to the patients? |  |  |  |
| 510 | I provide adequate time for decision to sign on the informed consent form                                      |  |  |  |
| 511 | I provide an opportunity to ask questions to the patients                                                      |  |  |  |
| 512 | I assess the competence of my patients to give consent to treatment/procedure                                  |  |  |  |
| 513 | I check that my patients understand the explanations I provided to them                                        |  |  |  |

**Thank you for your participation!!!**
